# Supplementary material for: An Archaeometric Study of the Iron Age Ceramics from Quinta Do Almaraz Archaeologic Site (8th to 5th Centuries BC). Colour and Mineralogic Characterization
Source: Preprints.org preprint supplement (doi:10.20944/preprints202401.1327.v1), 2024-01-17
Supplement: Supplementary file 1 [file supplementary]

| Table S2 - Chemical composition of the powdered pastes of the ceramic fragments collected in the Almaraz archaeological site, obtained by XRF. Data are presented as wt.% for major and minor constituents and ppm for trace elements. (nd: not detected; nq: not quantified). | |  | MgO | Al2O3 | SiO2 | | P2O5 | | K2O | CaO | | TiO2 | Fe2O3 | Mn | | V | Cr | | Ni | Cu | | Zn | | As | Rb | | Sr | | Zr | Nb | | Pb | (SiO2+Al2O3+K2O)/CaO | | | |
| --- | --- | --- | --- | --- | --- | --- | --- | --- | --- | --- | --- | --- | --- | --- | --- | --- | --- | --- | --- | --- | --- | --- | --- | --- | --- | --- | --- | --- | --- | --- | --- | --- | --- | --- | --- | --- |
|  | |  |
| Red Slip Tableware | | RS1 | 1.2 | 16.9 | 65.2 | | nd/nq | | 4.8 | 2.2 | | 1.3 | 8.4 | nd/nq | | 269 | 182 | | nd/nq | 52 | | 178 | | 23 | 115 | | 67 | | 249 | 24 | | 47 | 40 | | | |
| RS2 | nd/nq | 18.2 | 64.6 | | nd/nq | | 4.6 | 2.5 | | 1.3 | 8.6 | nd/nq | | 378 | 270 | | 412 | 114 | | 266 | | 43 | 118 | | 115 | | 282 | 33 | | 70 | 35 | | | |
| RS3 | nd/nq | 14.1 | 71.2 | | 0.4 | | 3.6 | 2.6 | | 0.9 | 6.7 | nd/nq | | 213 | 132 | | 2571 | 66 | | 138 | | 48 | 88 | | 94 | | 258 | 20 | | 61 | 34 | | | |
| RS4 | 1.4 | 14.5 | 64.9 | | nd/nq | | 4.6 | 5.4 | | 1.2 | 7.9 | nd/nq | | 240 | 159 | | 281 | 134 | | 219 | | nd/nq | 91 | | 107 | | 206 | 24 | | 59 | 16 | | | |
| RS5 | nd/nq | 13.5 | 56.8 | | nd/nq | | 4.1 | 15.4 | | 1.3 | 8.8 | nd/nq | | 225 | 201 | | nd/nq | 75 | | 191 | | 22 | 78 | | 225 | | 197 | 24 | | 54 | 5 | | | |
| RS6 | 1.6 | 17.8 | 63.0 | | nd/nq | | 4.7 | 2.5 | | 1.3 | 9.0 | nd/nq | | 273 | 209 | | nd/nq | 93 | | 215 | | 33 | 101 | | 86 | | 217 | 22 | | 39 | 34 | | | |
| RS7 | 1.2 | 16.8 | 65.2 | | nd/nq | | 4.6 | 2.3 | | 1.3 | 8.6 | nd/nq | | 271 | 203 | | nd/nq | 55 | | 163 | | 25 | 87 | | 71 | | 188 | 18 | | 31 | 38 | | | |
| RS8 | 1.6 | 20.0 | 60.4 | | nd/nq | | 4.9 | 2.4 | | 1.4 | 9.0 | nd/nq | | 482 | 284 | | 301.3 | 133 | | 315 | | 38 | 124 | | 90 | | 295 | 26 | | 59 | 36 | | | |
|  | |  |  |  |  | |  | |  |  | |  |  |  | |  |  | |  |  | |  | |  |  | |  | |  |  | |  |  | | | |
| Dercorated Ceramics | | DC 1 | 1.3 | 17.4 | 60.8 | | nd/nq | | 4.4 | 5.7 | | 1.3 | 9.0 | nd/nq | | 321 | 251 | | 196 | 63 | | 216 | | nd/nq | 102 | | 130 | | 234 | 23 | | 42 | 15 | | | |
| DC 2 | 1.2 | 19.6 | 61.5 | | nd/nq | | 4.9 | 2.0 | | 1.4 | 9.2 | nd/nq | | 356 | 289 | | nd/nq | 132 | | 276 | | 33 | 118 | | 100 | | 245 | 27 | | 51 | 43 | | | |
| DC 3 | 1.5 | 17.4 | 65.1 | | 0.2 | | 4.5 | 1.9 | | 1.3 | 7.8 | nd/nq | | 263 | 172 | | nd/nq | 56 | | 178 | | 27 | 113 | | 84 | | 287 | 26 | | 35 | 45 | | | |
| DC 4 | 1.8 | 18.4 | 63.1 | | 0.2 | | 4.9 | 1.6 | | 1.3 | 8.5 | nd/nq | | 363 | 213 | | 204 | 110 | | 204 | | 37 | 112 | | 58 | | 231 | 23 | | 41 | 55 | | | |
|  | |  |  |  |  | |  | |  |  | |  |  |  | |  |  | |  |  | |  | |  |  | |  | |  |  | |  |  | | | |
| Yellow Slip Tableware | | YS 1 | 1.4 | 14.9 | 58.1 | | 0.0 | | 4.4 | 10.0 | | 1.4 | 9.5 | nd/nq | | 288 | 234 | | 410 | 73 | | 217 | | 24 | 97 | | 191 | | 226 | 29 | | 41 | 8 | | | |
| YS 2 | 1.5 | 14.1 | 59.8 | | 0.0 | | 4.3 | 9.7 | | 1.3 | 9.1 | nd/nq | | 280 | 213 | | 205 | nd/nq | | 173 | | 26 | 81 | | 155 | | 187 | 23 | | 36 | 8 | | | |
| YS 3 | 0.0 | 17.3 | 50.4 | | 0.2 | | 3.2 | 16.7 | | 1.5 | 10.3 | 509 | | 519 | 430 | | 812 | 204 | | 234 | | 58 | 76 | | 509 | | 219 | 32 | | 45 | 4 | | | |
| YS 4 | 1.6 | 15.2 | 53.2 | | 0.3 | | 3.1 | 15.9 | | 1.3 | 9.1 | 352 | | 399 | 288 | | 318 | 92 | | 151 | | 43 | 61 | | 388 | | 191 | 22 | | 37 | 5 | | | |
|  | |  |  |  |  | |  | |  |  | |  |  |  | |  |  | |  |  | |  | |  |  | |  | |  |  | |  |  | | | |
| Grey  Tableware | | G 1 | nd/nq | 16.5 | 66.5 | | nd/nq | | 5.0 | 1.9 | | 1.3 | 8.6 | nd/nq | | 248 | 190 | | 360 | 47 | | 209 | | nd/nq | 110 | | 60 | | 262 | 25 | | 63 | 47 | | | |
| G 2 | nd/nq | 17.5 | 65.4 | | nd/nq | | 5.1 | 1.8 | | 1.4 | 8.7 | nd/nq | | 311 | 222 | | 318 | 56 | | 216 | | nd/nq | 105 | | 56 | | 236 | 23 | | 59 | 49 | | | |
| G 3 | 1.5 | 14.5 | 68.4 | | 0.4 | | 2.8 | 2.9 | | 1.1 | 8.1 | 793 | | 249 | 162 | | 1086 | 52 | | 140 | | 41 | 56 | | 111 | | 253 | 18 | | 41 | 29 | | | |
| G 4 | 1.2 | 14.4 | 68.2 | | 0.6 | | 2.8 | 3.0 | | 1.1 | 8.3 | 723 | | 241 | 184 | | 970 | 53 | | 137 | | 55 | 64 | | 150 | | 257 | 23 | | 41 | 29 | | | |
| G 5 | nd/nq | 17.9 | 58.9 | | 0.3 | | 4.9 | 3.2 | | 1.3 | 13.3 | nd/nq | | 249 | 188 | | 126 | 73 | | 187 | | 58 | 79 | | 89 | | 159 | 15 | | 32 | 26 | | | |
| G 6 | 1.4 | 20.3 | 57.3 | | 0.3 | | 5.2 | 3.1 | | 1.4 | 10.6 | nd/nq | | 521 | 352 | | 189 | 149 | | 334 | | 69 | 99 | | 99 | | 177 | 23 | | 58 | 26 | | | |
| Table S2 *- Continued.* | | | | | | | | | | | | | | | | | | | | | | | | | | | | | | | | | | | | | | | | | | | | | |
|
|  | | | | |  | |  | | |  | | | |  | | |  | | |  | |  | | |  | |  | | |  | | |  |  |  | |  |  |  |  |  |  |  |  |  |

|  |  | MgO | Al2O3 | SiO2 | P2O5 | K2O | CaO | TiO2 | Fe2O3 | Mn | V | Cr | Ni | Cu | Zn | As | Rb | Sr | Zr | Nb | Pb | (SiO2+Al2O3+K2O)/CaO |
| --- | --- | --- | --- | --- | --- | --- | --- | --- | --- | --- | --- | --- | --- | --- | --- | --- | --- | --- | --- | --- | --- | --- |
|  |  |
| Handmade Ceramics | H 1 | nd/nq | 14.3 | 63.9 | nd/nq | 4.4 | 3.2 | 0.9 | 13.0 | 395 | 222 | 195 | 1189 | 108 | 200 | 43 | 83 | 146 | 166 | 17 | 34 | 26 |
| H 2 | 1.9 | 15.3 | 63.7 | 0.3 | 1.2 | 4.9 | 0.9 | 11.5 | 490 | 289 | 519 | 430 | 89 | 63 | 42 | 22 | 244 | 104 | 15 | 17 | 16 |
| H 3 | 1.7 | 16.9 | 52.5 | 0.4 | 1.7 | 6.6 | 4.6 | 15.2 | 1304 | 610 | 501 | nd/nq | 68 | 125 | 41 | 19 | 351 | 220 | 58 | nd/nq | 11 |
| H 4 | 1.3 | 18.4 | 63.1 | 0.3 | 5.0 | 1.2 | 1.3 | 9.3 | nd/nq | 299 | 194 | nd/nq | 53 | 175 | 26 | 118 | 76 | 253 | 29 | 45 | 72 |
|  |  |  |  |  |  |  |  |  |  |  |  |  |  |  |  |  |  |  |  |  |  |  |
| Common Tableware | C1 | nd/nq | 14.7 | 69.0 | nd/nq | 4.9 | 2.0 | 1.3 | 8.0 | nd/nq | 208 | 192 | nd/nq | 45 | 158 | 29 | 86 | 47 | 219 | 20 | 114 | 44 |
| C 2 | nd/nq | 13.4 | 68.3 | 0.23 | 3.7 | 6.2 | 1.2 | 6.9 | nd/nq | 205 | 134 | 225 | 57 | 102 | 37 | 61 | 68 | 327 | 20 | 76 | 14 |
| C 3 | 1.41 | 13.9 | 64.8 | 0.22 | 4.2 | 7.0 | 0.8 | 7.4 | nd/nq | 228 | 139 | 1715 | 94 | 184 | 26 | 84 | 126 | 183 | 22 | 76 | 12 |
| C 4 | 1.81 | 14.0 | 50.3 | nd/nq | 2.9 | 21.7 | 1.4 | 7.7 | nd/nq | 252 | 219 | 434 | 59 | 147 | nd/nq | 62 | 196 | 212 | 29 | 81 | 3 |
| C 5 | nd/nq | 14.0 | 60.4 | nd/nq | 3.0 | 14.0 | 1.2 | 7.3 | nd/nq | 209 | 150 | 228 | nd/nq | 110 | nd/nq | 50 | 133 | 185 | 23 | 25 | 6 |
